# Supplementary material for: Fast-Charging Anode Materials and Novel Nanocomposite Design of Rice Husk-Derived SiO2 and Sn Nanoparticles Self-Assembled on TiO2(B) Nanorods for Lithium-Ion Storage Applications
Source: PubMed Central journal article supplement — ACS Omega. 2021 Dec 31;7(1):1357–67. doi: 10.1021/acsomega.1c05982 (PMC8756799; doi:10.1021/acsomega.1c05982), 2021-12-31

## Supporting Information

### Fast-Charging Anode Materials and Novel Nanocomposite Design of Rice Husk-Derived SiO<sub>2</sub> and Sn Nanoparticles Self-Assembled on TiO<sub>2</sub>(B) Nanorods for Lithium-Ion Storage Applications

*Thanapat Autthawong<sup>a,b</sup>, Chawin Yodbunork<sup>a,c</sup>, Waewwow Yodying<sup>a</sup>, Ruttapol Boonprachai<sup>a,b</sup>, Orapim Namsar<sup>a</sup>, Ai-shui Yu<sup>d</sup>, Yothin Chimupala<sup>b,e</sup>, and Thapanee Sarakonsri<sup>a,b,c,\*</sup>*

<sup>a</sup> Department of Chemistry, Faculty of Science, Chiang Mai University, Muang, Chiang Mai 50200, Thailand.

<sup>b</sup> Material Science Research Center, Faculty of Science, Chiang Mai University, Muang, Chiang Mai 50200, Thailand.

<sup>c</sup> Center of Excellent for Innovation in Chemistry (PERCH-CIC), Faculty of Science, Chiang Mai University, Thailand.

<sup>d</sup> Department of Chemistry, Fudan University, Yangpu, Shanghai 200438, China

<sup>e</sup> Department of Industrial Chemistry, Faculty of Science, Chiang Mai University, Muang, Chiang Mai 50200, Thailand

**Figure S1.** The STEM image (dark field) and the STEM-EDS element mapping of Ti, Si, C, O, and Sn in the prepared Sn-SiO<sub>2</sub>@TiO<sub>2</sub>(B) nanocomposite.

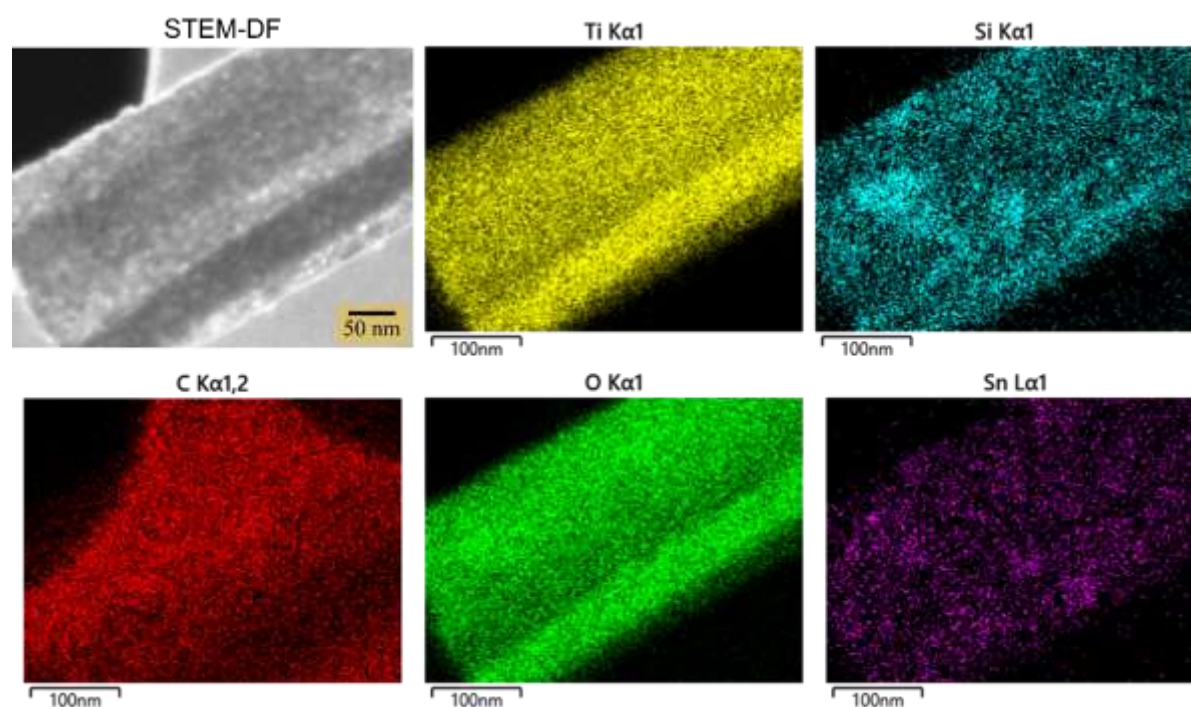

Supplement: ao1c05982_si_001.pdf [file ao1c05982_si_001.pdf]
